# Supplementary material for: Investigation on the fluorescence–(stimulus-response) properties of linear and star PVBCz-b-PDMAEMA block copolymers synthesized via ATRP
Source: Royal Society of Chemistry journal article supplement (doi:10.1039/c6ra14316d), 2016-01-01
Supplement: c6ra14316d1.pdf [file c6ra14316d1.pdf]

## Supplementary Information for

### Investigation on the fluorescence-(stimulus-response) properties of linear and star PVBCz-*b*-PDMAEMA block copolymers synthesized via ATRP

Tengfei Mao, Yanzi Gou\*, Hao Wang, Ke Jian, Jun Wang\*

*Science and Technology on Advanced Ceramic Fibers and Composites Laboratory,  
National University of Defence Technology, Changsha 410073, China*

Correspondence to: Yanzi Gou (E-mail: y.gou2012@hotmail.com) & Jun Wang (E-mail: wangjun\_cfc@nudt.edu.cn)

#### Synthetic procedures

##### *Synthesis of monomer (VBCz)*

VBCz was synthesized according to the reference<sup>1</sup>. A mixture of carbazole (5.00 g, 30.0 mmol), sodium hydroxide (1.20 g, 37.5 mmol) and tetra-*n*-butylammonium bromide (TBAB) (200 mg, 0.62 mmol) in DMF (100 mL) was stirred for 2 h. Then 1-(chloromethyl)-4-ethenyl-benzen (5.50 g, 36.0 mmol) was added dropwise, and the reaction mixture was continually stirred for 20 h at ambient temperature (scheme 1). The resulting mixture was precipitated in deionized water. The resultant white precipitate was filtered and dried under vacuum at 70°C. The crude product was purified by recrystallization from acetone to give 5.40 g of white crystals with a yield of 63.5%. <sup>1</sup>H-NMR(400 MHz, CDCl<sub>3</sub>, δ, ppm): 5.18-5.20 (d, 1H, CH<sub>2</sub>=C), 5.65 (s, 2H, N-CH<sub>2</sub>), 5.71-5.76 (d, 1H, CH<sub>2</sub>=C), 6.61-6.68 (m, 1H, CH<sub>2</sub>=CH), 7.13-7.15 (d, 2H, ArH), 7.21-7.64 (m, 8H, ArH), 8.17-8.19 (d, 2H, ArH). Anal.Calcd for C<sub>21</sub>H<sub>17</sub>N: C 89.01, H 6.05, N 4.94; Found: C 88.92, H 5.97, N 4.86.

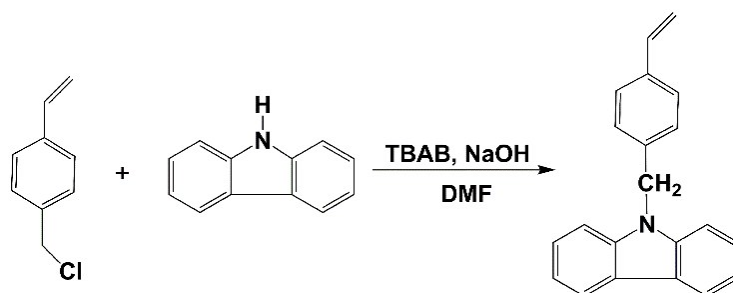

**Scheme S1.** Synthesis of the monomer (VBCz).

### *Synthesis of multi-functional initiators*<sup>2-4</sup>

**4-arm initiator** Pentaerythritol (3.29g, 24.2mmol) (2.79, 50.0mmol), TEA (15.2mL, 108.7mmol) were added into a Schlenk flask along with anhydrous THF (100 mL) by syringe under argon. Cooling the mixture to -18 °C, and 2-Bromo-iso-butyryl bromide (BiBB) (13.5mL, 108.7mmol) dissolved in anhydrous THF (40 mL) was added dropwise (Scheme 1b). The reaction solution was subjected to continuous stirring for 24 h at room temperature and then diluted with CH<sub>2</sub>Cl<sub>2</sub>. The resulting organic extracts were washed twice with 200 mL HCl (2 M), twice with 200 mL saturated NaHCO<sub>3</sub>, and twice with 200mL saturated NaCl in turn. The solution was then dried with anhydrous MgSO<sub>4</sub>. (Scheme 2). The resultant mixture was filtered, concentrated, recrystallized from hot methanol and filtered to afford 11.5g (yield: 65%) of 4-arm initiator as a colorless crystalline solid. <sup>1</sup>H-NMR(400 MHz, CDCl<sub>3</sub>, δ, ppm): 1.88 (s, 24H, 8CH<sub>3</sub>), 4.27 (s, 8H, 4CH<sub>2</sub>). <sup>13</sup>C-NMR(100 MHz, CDCl<sub>3</sub>, δ, ppm): 29.7 (8CH<sub>3</sub>), 42.9 (C(CH<sub>2</sub>O)<sub>4</sub>), 54.3 (4CBr), 61.8 (4CH<sub>2</sub>O), 169.8 (4C=O). (Scheme S2)

**6-arm initiator** The procedure was the same as discussed in the previous section except that dipentaerythritol (2.20g, 7.85mmol) was used instead of ethylene glycol. TEA (10.0mL, 71.5mmol), anhydrous THF (100 mL) and 2-bromo-2-methylpropanoyl bromide (8.8mL, 70.9mmol) dissolved in anhydrous THF (20 mL) was added sequentially in this reaction (Scheme 2). This procedure afforded 5.1g (yield: 52%) of 6-arm initiator as a colourless crystalline solid. <sup>1</sup>H-NMR(400 MHz, CDCl<sub>3</sub>, δ, ppm): 1.94 (s, 36H, 12CH<sub>3</sub>), 3.60 (s, 4H, CH<sub>2</sub>OCH<sub>2</sub>), 4.29 (s, 12H,

6CH<sub>2</sub>O). <sup>13</sup>C-NMR(100MHz, CDCl<sub>3</sub>, δ, ppm): 30.6 (12CH<sub>3</sub>), 43.9 (2C(CH<sub>2</sub>)<sub>4</sub>), 55.2 (6CBr), 63.2 (6CH<sub>2</sub>O), 69.3 (CH<sub>2</sub>OCH<sub>2</sub>), 170.6 (6C=O). (Scheme S2)

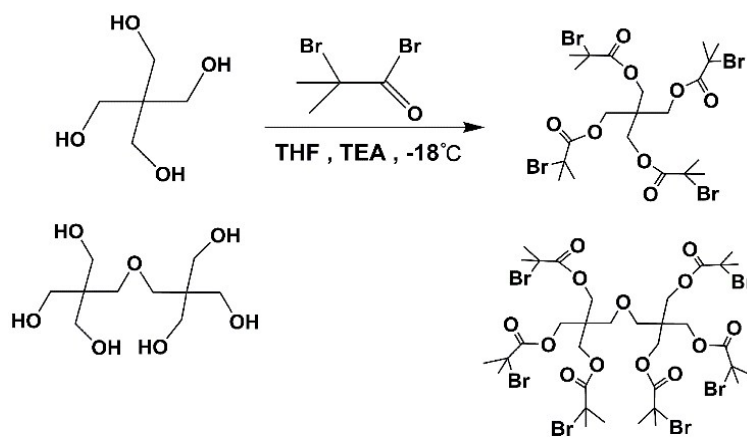

**Scheme S2.** Synthesis of the multi-functional initiators

**Table S1** Reaction conditions of the star PVBCz

| Sample      | VBCz<br>(mmol) | Initiator<br>(mmol) | CuBr<br>(mmol) | PMDETA<br>(mmol) | [M]/[I] | Cyclohexanone<br>(mL) | Reaction<br>Time (h) |
|-------------|----------------|---------------------|----------------|------------------|---------|-----------------------|----------------------|
| 1-arm PVBCz | 8.00           | 0.80                | 0.80           | 1.60             | 10      | 10                    | 1                    |
| 4-arm PVBCz | 8.00           | 0.27                | 0.27           | 0.54             | 30      | 10                    | 2                    |
| 6-arm PVBCz | 8.00           | 0.16                | 0.16           | 0.32             | 50      | 10                    | 2                    |

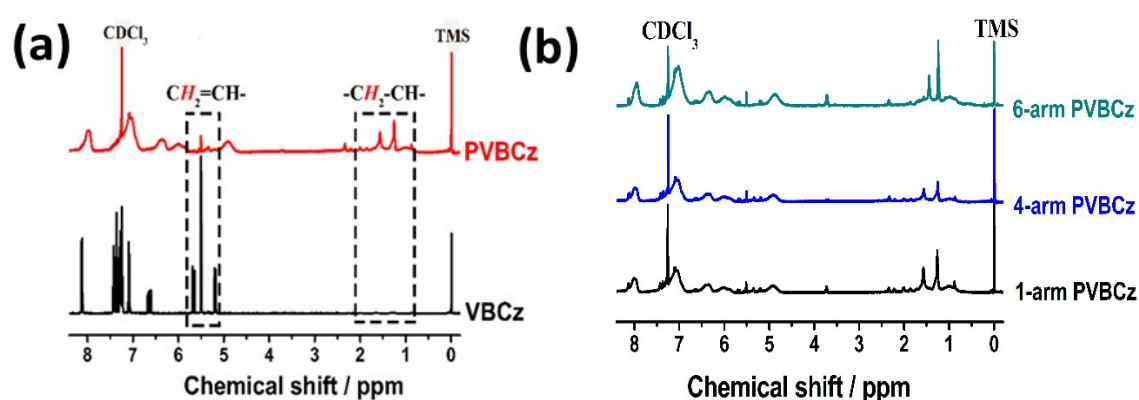

**Fig. S1** <sup>1</sup>H-NMR spectra of (a) VBCz and 4-arm PVBCz. (b) the PVBCz linear and star polymers.

**Table 2** Polymerization conditions and molecular weight parameters of the 6-arm PVBCz-*b*-PDMAEMA block copolymers.

| Sample | feed ratio <sup>a</sup> | Reaction Time (h) | $M_n^b$<br>( $\times 10^4$ g·mol <sup>-1</sup> ) | $M_w^b$<br>( $\times 10^4$ g·mol <sup>-1</sup> ) | PDj <sup>b</sup> | DP <sub>arm</sub> <sup>c</sup> | Ratio <sub>arm, GPC</sub> <sup>d</sup> | Ratio <sub>arm, NMR</sub> <sup>d</sup> |
|--------|-------------------------|-------------------|--------------------------------------------------|--------------------------------------------------|------------------|--------------------------------|----------------------------------------|----------------------------------------|
| L6-1   | 100                     | 2                 | 4.17                                             | 5.80                                             | 1.39             | 8+30                           | 1 : 3.8                                | 1 : 4.4                                |
| L6-2   | 500                     | 5                 | 8.41                                             | 11.86                                            | 1.41             | 8+75                           | 1 : 9.4                                | 1 : 11.9                               |
| L6-3   | 800                     | 7                 | 13.33                                            | 15.86                                            | 1.19             | 8+106                          | 1 : 13.3                               | 1 : 12.4                               |

<sup>a</sup> feed ratio is the ratio of VBCz to the initiator. <sup>b</sup> Determined by GPC. <sup>c</sup> DP, the number-average degree of polymerization of PVBCz ; <sup>c</sup> DP<sub>arm</sub>, the number-average degree of polymerization of PVBCz on every arm.

<sup>d</sup> Ratio<sub>arm, GPC</sub>, the block ratios of PVBCz to PDMAEMA calculated according to the GPC results; <sup>d</sup> Ratio<sub>arm, NMR</sub>, the block ratios calculated according to the <sup>1</sup>H-NMR spectra.

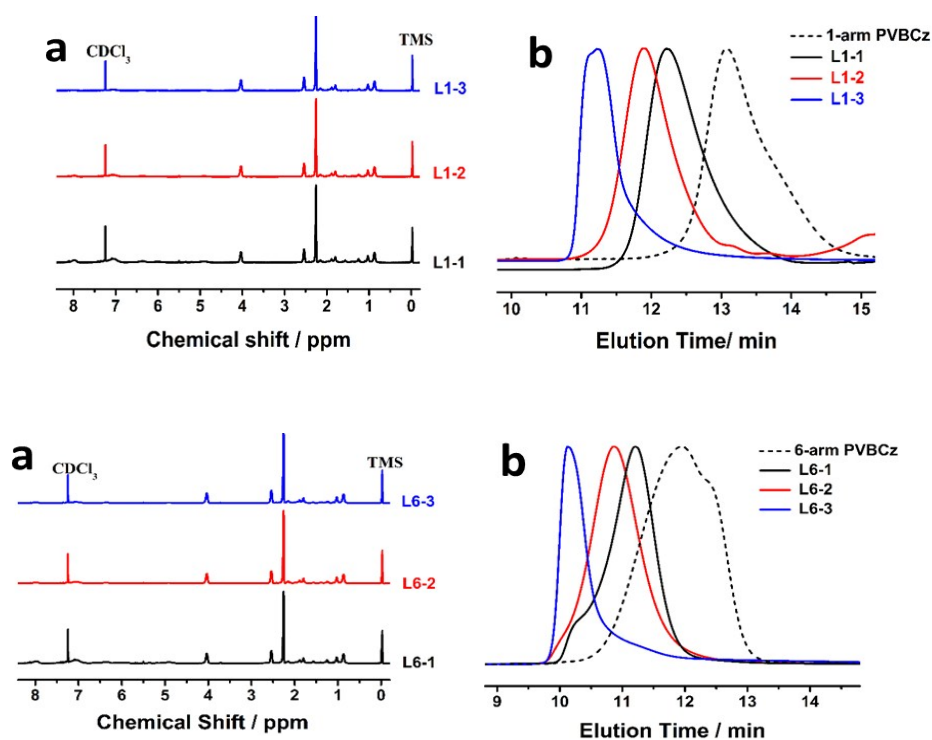

**Fig. S2** <sup>1</sup>H-NMR spectra (a) and GPC traces (b) of the 1- and 6-arm PVBCz-*b*-PDMAEMA

## Notes and references

1. J. L. Liu, W. W. He, L. F. Zhang, Z. B. Zhang, J. Zhu, L. Yuan, H. Chen, Z. P. Cheng and X. L. Zhu, *Langmuir* **2011**, 27, 12684-12692.
2. F. Chen, G. Liu, G. Zhang, *J. Phys. Chem. B.* **2012**, 116, 10941-10950.
3. Z. Zhang, T. Hughes, X. Hao and G. G. Qiao, *Polymer* **2013**, 54, 4446-4454.
4. Y. F. Tong, L. Chen, X. H. He and Y. W. Chen, *J. Polym. Sci., Part A: Polym. Chem.* **2013**, 51, 4341-4350.
